# Supplementary material for: Enhancement of large-scale flood risk assessments using building-material-based vulnerability curves for an object-based approach in urban and rural areas
Source: Copernicus journal article supplement (doi:10.5194/nhess-19-1703-2019), 2019-08-12
Supplement: Supplementary file 1 [file nhess-19-1703-2019-supplement.pdf]

Supplement of Nat. Hazards Earth Syst. Sci., 19, 1703–1722, 2019  
<https://doi.org/10.5194/nhess-19-1703-2019-supplement>  
© Author(s) 2019. This work is distributed under  
the Creative Commons Attribution 4.0 License.

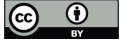

*Supplement of*

**Enhancement of large-scale flood risk assessments using  
building-material-based vulnerability curves for an  
object-based approach in urban and rural areas**

**Johanna Englhardt et al.**

*Correspondence to:* Johanna Englhardt ([englhardt.johanna@gmail.com](mailto:englhardt.johanna@gmail.com))

The copyright of individual parts of the supplement might differ from the CC BY 4.0 License.

## Supplementary Material

### S1 Construction typology

In general, for the mapping of construction types, the materials used for the structural frame and the bearing walls are a main factor in order to differentiate between individual types. Furthermore, the characteristics of each type are for example also  
5 influenced by local building practices, building codes and other materials used. Therefore there are often similarities between construction types and depending on the available information further subtypes can be differentiated. For example unreinforced masonry (URM) is a general description of buildings with bearing walls made from individual units of some masonry material typically bound together by some form of mortar. With more available information on attributes such as the size of brick, the used material (e.g. clay, stone, concrete), or the type of mortar (mud or cement based), subtypes can be  
10 separated (for example the ImageCat data differentiates BRK (URM brick building), CB (URM concrete block building), UFB (unreinforced fired brick masonry building) and UCB (unreinforced concrete block building)). Similarly the very traditional buildings such as EARTH (earthen building), M (mud walls building), RE (rammed earth building), and ADB (URM adobe building) are made from soil materials mixed for example with straw and cement. The material can then be formed into bricks and sun-dried, whereas for RE buildings the soil is rammed using wooden molds. The ImageCat structure  
15 DS (stone masonry) is similar to buildings made from rubble stones. More information can be found in supplementary table 1 containing the PAGER typology or further in the descriptions of the World Housing Encyclopedia<sup>1</sup>.

### S2 Comparison of risk and flood protection influence

Risk is defined as the product of hazard, exposure and vulnerability and expressed as the expected annual damage (EAD) in  
20 this paper. The hazard component is comprised of layers of inundation extent and depth for nine return periods (50% to 0.1% annual exceedance probability). The inundation associated with each return period is assumed to occur everywhere simultaneously and we calculate the expected annual damage as the integral of the exceedance probability-impact curve. With this probabilistic analysis the total EAD for Ethiopia in our model is \$213.2mln/yr (\$46.7mln/yr for rural and \$166.6mln/yr for urban areas).

25 The validation of risk values is difficult as publicly available losses for flood events especially in developing countries, are, if observed at all, rough estimates and often limited to low-frequency, high-impact events. Therefore, modelled and observed metrics are different, since the reported losses do not include information on all flood probabilities. Generating the flood events and their damage stochastically would be a different approach to calculate the risk or might be used to support a dataset of reported losses as the synthetic realizations could extend missing parts of the exceedance probability-impact curve.

---

<sup>1</sup> <http://www.db.world-housing.net/>

However, this also would raise the question of the validation of those risk results and validation of the stochastic generated hazard layer of the events.

In our flood risk assessment we assume that Ethiopia is only protected against floods with a return period of 2 years, whilst in reality there may be higher flood protection in place for the most flood-prone areas, especially in the main urban areas.

- 5 Estimates of EAD are very sensitive to the assumed protection standard (Ward et al., 2017). For example, if we assumed that Ethiopia was protected against floods with a return period of 5 years, the EAD would fall to \$124.5mln/yr (\$96.3mln/yr urban, \$28.2mln/yr rural) which is similar to the country's flood risk (\$135.5mln) in the 2015 Global Assessment Report (UNISDR, 2015) .

**Table S1. Pager construction types with assigned flood vulnerability classes.**

| PAGER | Description                                                                          | Vuln. Class | PAGER | Description                                                                                        | Vuln. Class | PAGER | Description                                                                                                        | Vuln. Class |
|-------|--------------------------------------------------------------------------------------|-------------|-------|----------------------------------------------------------------------------------------------------|-------------|-------|--------------------------------------------------------------------------------------------------------------------|-------------|
| W5    | Wattle and Daub (Walls with bamboo/light timber log/reed mesh and post).             | I           | UFB5  | Unreinforced fired brick masonry, cement mortar, but with reinforced concrete floor and roof slabs | III         | C4    | Nonductile reinforced concrete frame without masonry infill walls                                                  | IV          |
| M     | Mud walls                                                                            | I           | UCB   | Concrete block unreinforced masonry with lime or cement mortar                                     | III         | C4L   | Nonductile reinforced concrete frame without masonry infill walls low-rise                                         | IV          |
| M1    | Mud walls without horizontal wood elements                                           | I           | MS    | Massive stone masonry in lime or cement mortar                                                     | III         | C4M   | Nonductile reinforced concrete frame without masonry infill walls mid-rise                                         | IV          |
| M2    | Mud walls with horizontal wood elements                                              | I           | UNK   | Not specified (unknown/default)                                                                    | III         | C4H   | Nonductile reinforced concrete frame without masonry infill walls high-rise                                        | IV          |
| A     | Adobe blocks (unbaked sundried mud block) walls                                      | I           | S     | Steel                                                                                              | IV          | C5    | Steel reinforced concrete (Steel members encased in reinforced concrete)                                           | IV          |
| A1    | Adobe block, mud mortar, wood roof and floors                                        | I           | S1    | Steel moment frame                                                                                 | IV          | C5L   | Steel reinforced concrete (Steel members encased in reinforced concrete) low-rise                                  | IV          |
| A2    | Adobe block, mud mortar, bamboo, straw, and thatch roof                              | I           | S1L   | Steel moment frame low-rise                                                                        | IV          | C5M   | Steel reinforced concrete (Steel members encased in reinforced concrete) mid-rise                                  | IV          |
| A3    | Adobe block, straw, and thatch roof cement-sand mortar                               | I           | S1M   | Steel moment frame mid-rise                                                                        | IV          | C5H   | Steel reinforced concrete (Steel members encased in reinforced concrete) high-rise                                 | IV          |
| A4    | Adobe block, mud mortar, reinforced concrete bond beam, cane and mud roof            | I           | S1H   | Steel moment frame high-rise                                                                       | IV          | C6    | Concrete moment resisting frame with shear wall - dual system                                                      | IV          |
| A5    | Adobe block, mud mortar, with bamboo or rope reinforcement                           | I           | S2    | Steel braced frame                                                                                 | IV          | C6L   | Concrete moment resisting frame with shear wall - dual system low-rise                                             | IV          |
| RE    | Rammed Earth/Pneumatically impacted stabilized earth                                 | I           | S2L   | Steel braced frame low-rise                                                                        | IV          | C6M   | Concrete moment resisting frame with shear wall - dual system mid-rise                                             | IV          |
| INF   | Informal constructions.                                                              | I           | S2M   | Steel braced frame mid-rise                                                                        | IV          | C6H   | Concrete moment resisting frame with shear wall - dual system high-rise                                            | IV          |
| W     | Wood                                                                                 | II          | S2H   | Steel braced frame high-rise                                                                       | IV          | C7    | Flat slab structure                                                                                                | IV          |
| W1    | Wood stud-wall frame with plywood/gypsum board sheathing.                            | II          | S3    | Steel light frame                                                                                  | IV          | PC1   | Precast concrete tilt-up walls                                                                                     | IV          |
| W2    | Wood frame, heavy members (with area > 5000 sq. ft.)                                 | II          | S4    | Steel frame with cast-in-place concrete shear walls                                                | IV          | PC2   | Precast concrete frames with concrete shear walls                                                                  | IV          |
| W3    | Wood light unbraced post and beam frame.                                             | II          | S4L   | Steel frame with cast-in-place concrete shear walls low-rise                                       | IV          | PC2L  | Precast concrete frames with concrete shear walls low-rise                                                         | IV          |
| W4    | Wood panel or log construction.                                                      | II          | S4M   | Steel frame with cast-in-place concrete shear walls mid-rise                                       | IV          | PC2M  | Precast concrete frames with concrete shear walls mid-rise                                                         | IV          |
| W6    | Wood unbraced heavy post and beam frame with mud or other infill material.           | II          | S4H   | Steel frame with cast-in-place concrete shear walls high-rise                                      | IV          | PC2H  | Precast concrete frames with concrete shear walls high-rise                                                        | IV          |
| W7    | Wood braced frame with load-bearing infill wall system.                              | II          | S5    | Steel frame with unreinforced masonry infill walls                                                 | IV          | PC3   | Precast reinforced concrete moment resisting frame with masonry infill walls                                       | IV          |
| MH    | Mobile homes                                                                         | II          | S5L   | Steel frame with unreinforced masonry infill walls low-rise                                        | IV          | PC3L  | Precast reinforced concrete moment resisting frame with masonry infill walls low-rise                              | IV          |
| RS    | Rubble stone (field stone) masonry                                                   | III         | S5M   | Steel frame with unreinforced masonry infill walls mid-rise                                        | IV          | PC3M  | Precast reinforced concrete moment resisting frame with masonry infill walls mid-rise                              | IV          |
| RS1   | Local field stones dry stacked (no mortar) with timber floors, earth, or metal roof. | III         | S5H   | Steel frame with unreinforced masonry infill walls high-rise                                       | IV          | PC3H  | Precast reinforced concrete moment resisting frame with masonry infill walls high-rise                             | IV          |
| RS2   | Local field stones with mud mortar.                                                  | III         | C     | Reinforced concrete                                                                                | IV          | PC4   | Precast panels (wall made of number of horizontal precast panels, construction from former Soviet Union countries) | IV          |
| RS3   | Local field stones with lime mortar.                                                 | III         | C1    | Ductile reinforced concrete moment frame with or without infill                                    | IV          | RM    | Reinforced masonry                                                                                                 | IV          |
| RS4   | Local field stones with cement mortar, vaulted brick roof and floors                 | III         | C1L   | Ductile reinforced concrete moment frame with or without infill low-rise                           | IV          | RM1   | Reinforced masonry bearing walls with wood or metal deck diaphragms                                                | IV          |
| RS5   | Local field stones with cement mortar and reinforced concrete bond beam.             | III         | C1M   | Ductile reinforced concrete moment frame with or without infill mid-rise                           | IV          | RM1L  | Reinforced masonry bearing walls with wood or metal deck diaphragms low-rise                                       | IV          |
| DS    | Rectangular cut-stone masonry block                                                  | III         | C1H   | Ductile reinforced concrete moment frame with or without infill high-rise                          | IV          | RM1M  | Reinforced masonry bearing walls with wood or metal deck diaphragms mid-rise (4+ stories)                          | IV          |
| DS1   | Rectangular cut stone masonry block with mud mortar, timber roof and floors          | III         | C2    | Reinforced concrete shear walls                                                                    | IV          | RM2   | Reinforced masonry bearing walls with concrete diaphragms                                                          | IV          |
| DS2   | Rectangular cut stone masonry block with lime mortar                                 | III         | C2L   | Reinforced concrete shear walls low-rise                                                           | IV          | RM2L  | Reinforced masonry bearing walls with concrete diaphragms low-rise                                                 | IV          |
| DS3   | Rectangular cut stone masonry block with cement mortar                               | III         | C2M   | Reinforced concrete shear walls mid-rise                                                           | IV          | RM2M  | Reinforced masonry bearing walls with concrete diaphragms mid-rise                                                 | IV          |
| DS4   | Rectangular cut stone masonry block with reinforced concrete floors and roof         | III         | C2H   | Reinforced concrete shear walls high-rise                                                          | IV          | RM2H  | Reinforced masonry bearing walls with concrete diaphragms high-rise                                                | IV          |
| UFB   | Unreinforced fired brick masonry                                                     | III         | C3    | Nonductile reinforced concrete frame with masonry infill walls                                     | IV          | CM    | Confined masonry                                                                                                   | IV          |
| UFB1  | Unreinforced brick masonry in mud mortar without timber posts                        | III         | C3L   | Nonductile reinforced concrete frame with masonry infill walls low-rise                            | IV          | CML   | Confined masonry low-rise                                                                                          | IV          |
| UFB2  | Unreinforced brick masonry in mud mortar with timber posts                           | III         | C3M   | Nonductile reinforced concrete frame with masonry infill walls mid-rise                            | IV          | CMM   | Confined masonry mid-rise                                                                                          | IV          |
| UFB3  | Unreinforced brick masonry in lime mortar                                            | III         | C3H   | Nonductile reinforced concrete frame with masonry infill walls high-rise                           | IV          | CMH   | Confined masonry high-rise                                                                                         | IV          |
| UFB4  | Unreinforced fired brick masonry, cement mortar.                                     | III         |       |                                                                                                    |             |       |                                                                                                                    |             |

**Table S2. Confusion matrix of urban settlement map of the ImageCat data as reference with different classification maps.**

|          |                                      | ImageCat       |                       |
|----------|--------------------------------------|----------------|-----------------------|
|          |                                      | Other land use | Settlement<br>(urban) |
| GRUMP    | Other land use                       | 9,967          | 7,363                 |
|          | Settlement                           | 33             | 2,637                 |
| MOD500   | Other land use                       | 9,995          | 9,403                 |
|          | Settlement                           | 5              | 597                   |
| GUF      | Other land use                       | 9,997          | 8,792                 |
|          | Settlement                           | 3              | 1,208                 |
| HBASE    | Other land use                       | 9,999          | 8,618                 |
|          | Settlement                           | 1              | 1,382                 |
| GHS-SMOD | Other land use                       | 9,855          | 5,150                 |
|          | Settlement<br>(urban centre/cluster) | 145            | 4,850                 |
| GHS-SMOD | Other land use                       | 9,855          | 5,150                 |
|          | Settlement<br>(urban centre)         | 145            | 4,850                 |

**5 Table S3. Confusion matrix of urban-rural map of the ImageCat data as reference with GHS-SMOD as classification maps.**

|          |                           | ImageCat          |       |       |
|----------|---------------------------|-------------------|-------|-------|
|          |                           | Other<br>land use | Rural | Urban |
| GHS-SMOD | Other land use            | 9,484             | 8,231 | 3,123 |
|          | Rural                     | 411               | 1,101 | 2,004 |
|          | Urban<br>(centre/cluster) | 105               | 668   | 4,873 |

**Table S4. Results of agreement for Ethiopia using the ImageCat data classified to urban settlement and other land use as the reference map.**

| Settlement Map                  | Settlement (urban)      |                     | Other land use          |                     | Overall Accuracy (%) | Kappa |
|---------------------------------|-------------------------|---------------------|-------------------------|---------------------|----------------------|-------|
|                                 | Producer's Accuracy (%) | User's Accuracy (%) | Producer's Accuracy (%) | User's Accuracy (%) |                      |       |
| GRUMP                           | 26.4                    | 98.8                | 99.7                    | 57.5                | 63.0                 | 0.26  |
| MOD500                          | 6.0                     | 99.2                | 100.0                   | 51.5                | 53.0                 | 0.06  |
| GUF                             | 12.1                    | 99.8                | 100.0                   | 53.2                | 56.0                 | 0.12  |
| HBASE                           | 13.8                    | 99.9                | 100.0                   | 53.7                | 56.9                 | 0.14  |
| GHS-SMOD (urban centre/cluster) | 48.5                    | 97.1                | 98.6                    | 65.7                | 73.5                 | 0.47  |
| GHS-SMOD (urban centre)         | 25.0                    | 99.2                | 99.8                    | 57.1                | 62.4                 | 0.25  |

**5 Table S5. Building footprints for sensitivity analysis derived from the ImageCat data of flood risk assessment for Ethiopia.**

| Vuln. class  | Building footprint [m <sup>2</sup> ] |
|--------------|--------------------------------------|
| I            | 35                                   |
| II           | 35                                   |
| III 1 floor  | 35                                   |
| III 2 floors | 251                                  |
| IV           | 467                                  |

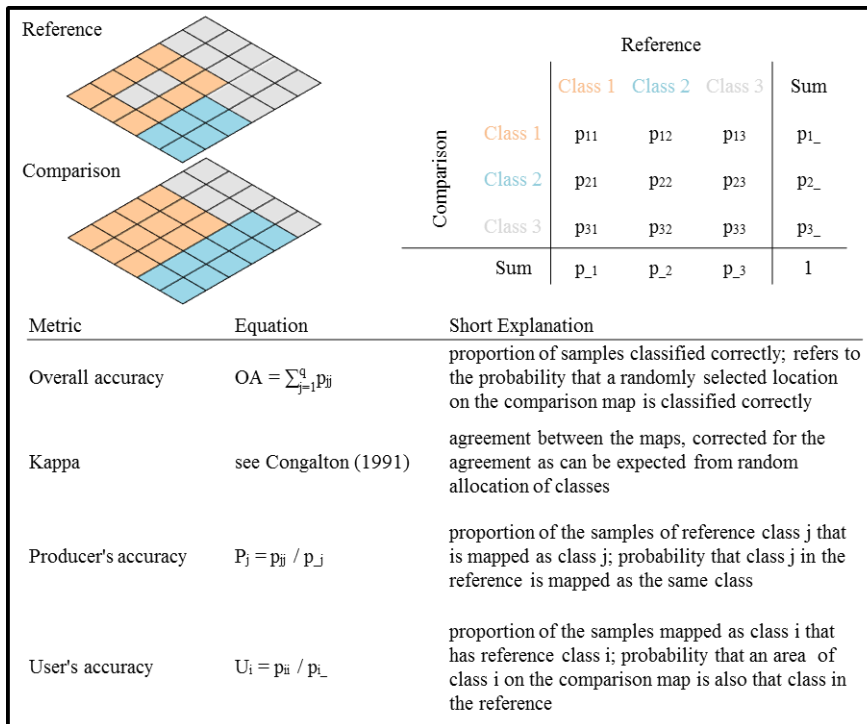

Figure S1. Example accuracy assessment using a confusion matrix of  $q$  classes and  $p_{ij}$  representing the proportion of samples that has classification class  $i$  and reference class  $j$ .

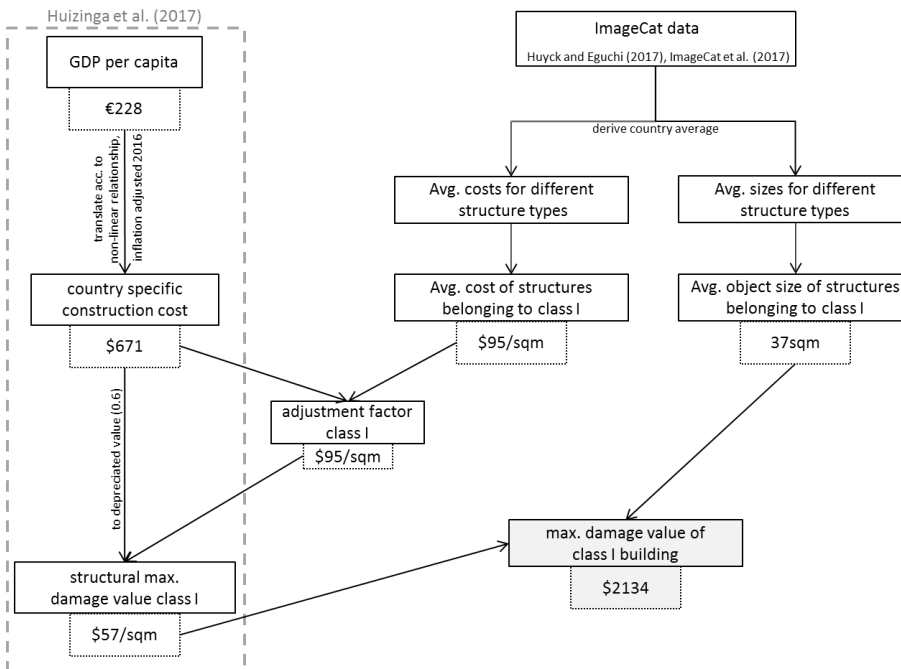

5 Figure S2. Process of calculating the maximum damage value for the example of a class I building.

## References

- Congalton, R. G.: A Review of Assessing the Accuracy of Classifications of Remotely Sensed Data, *Remote Sensing of Environment*, 37, 35-46, 1991.
- Huizinga, J., De Moel, H., and Szewczyk, W.: Global flood depth-damage functions. Methodology and the database with guidelines, European Commission Joint Research Centre, doi:10.2760/16510, 2017.
- Huyck, C. K. and Eguchi, M.: GFDRR Africa Disaster Risk Financing - Result Area 5 Exposure Development. Replacement Cost Refinements to the Exposure data, Prepared for World Bank, GFDRR, 2017.
- ImageCat, CIESIN, and Porter, K.: Africa Disaster Risk Financing Phase 1 - Result Area 5, Exposure Development for 5 Sub-Saharan African countries - Ethiopia, Kenya, Uganda, Niger, Senegal, 2017.
- 10 UNISDR: Global Assessment Report on Disaster Risk Reduction 2015. Ethiopia country risk profile, United Nations Office for Disaster Risk Reduction, Geneva, Switzerland, <https://preventionweb.net/english/hyogo/gar/2015/en/home/data.php?iso=ETH>, 2015.
- 15 Ward, P. J., Jongman, B., Aerts, J. C. J. H., Bates, P. D., Botzen, W. J. W., Diaz Loaiza, A., Hallegatte, S., Kind, J. M., Kwadijk, J., Scussolini, P., and Winsemius, H. C.: A global framework for future costs and benefits of river-flood protection in urban areas, *Nature Climate Change*, 7, 642, doi:10.1038/nclimate3350, 2017.
